# Supplementary material
Source: HighWire-hosted journal article supplement (http://ard.bmjjournals.com/highwire/filestream/203039/field_highwire_adjunct_files/1/supp_fig.pdf)

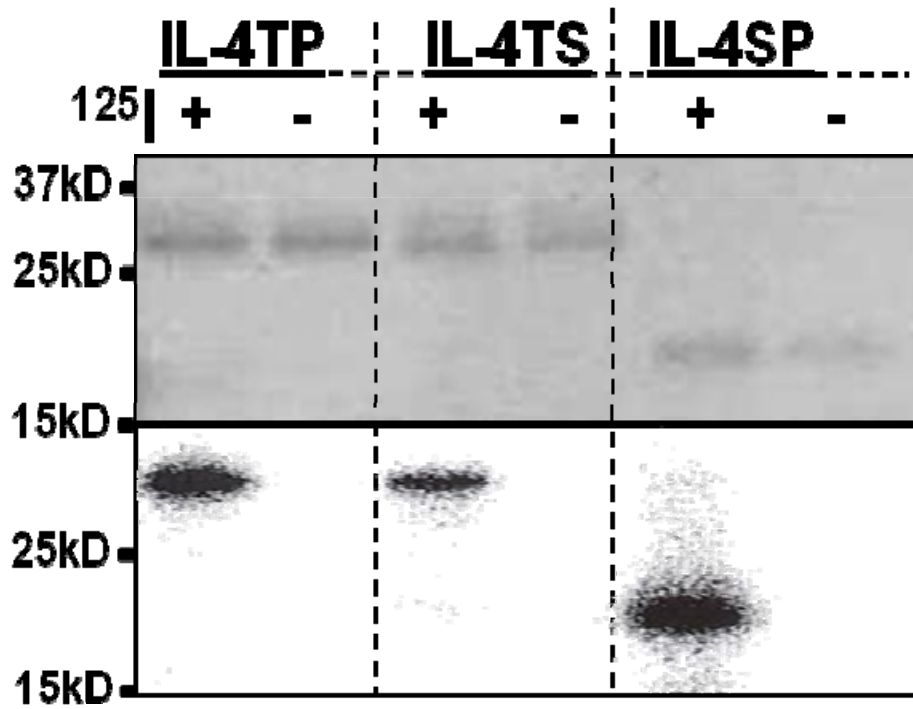

**Supplementary Figure-1 (Wythe)**

Supplement: supp_fig.pdf [file supp_fig.pdf]
